# Supplementary material for: Characteristics and degradation of organic aerosols from cooking sources based on hourly observation of organic molecular markers in urban environment
Source: Copernicus journal article supplement (doi:10.5194/acp-2022-586), 2022-09-05
Supplement: Supplementary file [file acp-2022-586-AC2-supplement.pdf]

## Response to comments by Reviewer#2

We thank the reviewer for the detailed and constructive review comments. Below is our point-by-point response to each comment, marked in blue. Changes made to the main text are marked in red.

### General comments:

This study aims to characterize the cooking organic aerosol markers evolution in the atmosphere. The study employs online thermal desorption aerosol gas chromatography mass spectrometry (TAG) to analyse the organic component of PM<sub>2.5</sub> from urban Changzhou, China. The study identified and attributed saturated fatty acids, unsaturated fatty acids, and oxidative decomposition products of unsaturated fatty acids as the molecular marker of cooking sources. Additionally, the decomposition of these markers was estimated using an established ageing parameterisation model, and the contribution of the cooking source to PM<sub>2.5</sub> was estimated using a positive matrix factorisation model.

The online molecular analysis employed by this study gives a great deal of data that, unfortunately not being optimally used in the analysis and discussion. The study adopted and modified analysis methods by Wang et al. (2020) and Wang and Yu (2021). However, the modification is not entirely justified, raising more questions about the results and discussion. Finally, the association of fatty acids as cooking source molecular markers need more evidence/analysis that considers the other sources, such as biomass burning and marine aerosol.

The manuscript is well written, with some typos that can be improved after thorough checking. The topic presented in this study fits within the scope of the Atmospheric Chemistry and Physics journal. My main concerns are the insufficient evidence to support the cooking organic aerosol molecular marker characterisation and their atmospheric decomposition. In summary, I recommend the Editor reconsider the manuscript after major revisions

**Response:** We thank the reviewer for the comment. We have conducted further data analysis and carefully revised the manuscript to make sure that: (1) the association of fatty acids as cooking source molecular makers is well clarified with more evidence and analysis; (2) the cooking organic aerosol molecular maker characterization and their atmospheric decomposition is well supported by further data analysis; (3) typos are corrected by a thorough language check. Revisions are highlighted in yellow in the revised paper. It should also be noted that in the revised manuscript,

palmitic acid is replaced with stearic acid as a reference compound. In brief, the denominator in the calculation of the ratio of unsaturated fatty acids/saturated fatty acids (uFAs/sFAs) as well as oxidative decomposition products /saturated fatty acids (ODPs/sFAs) is stearic acid. In this manuscript, we reviewed the molecular marker fingerprint of fatty acids from different sources (palmitic acid to stearic acid ratio, P/S) and the relationship between P/S and the ratio of oleic acid /stearic acid (O/S) in organic molecular markers emitted from different cooking types (Fig.4). We also explored the profiles of P/S and O/S in FAs from sea spray aerosol emissions and concluded that sea spray aerosol was not a major contributor to FAs in urban areas during the observation period. We do not include the impact of aging sea spray aerosol on non-coastal cities, where the impact is negligible.

**Specific comments:**

1. Although following previous studies, The Methods section needs explanation and clarifications, which are as listed below.

a). The PM<sub>2.5</sub> sampling method (Lines 94-96: flow rate, residence time, type of collection matrix, etc)

b). The post-sampling analysis (Lines 100-102: brief procedures). For example, an hourly sampling will result in 24 samples at maximum. An hour of sampling plus 1.5-hour post processing before starting a new sampling sequence will result in less than 12 samples per day.

**Response:** We have revised the Methods section. Please refer to Lines 93-110.

**Lines 93-110:** “Quantification of hourly speciated organic markers was achieved using TAG. The operation details and data quality have been described in our previous work (Wang et al., 2020; Zhang et al., 2021). The sampling and analysis sequence of the TAG system includes four steps: (a) PM<sub>2.5</sub> sampling and synchronous gas chromatography-mass spectrometry (GC-MS) analysis of the previous sample; (b) loading of the internal standards (IS) from the standards (STD) reservoir to a thermal desorption cell; (c) derivatization and thermal desorption of analytes on the collection and thermal desorption (CTD) cell and subsequent preconcentration of the analytes in focusing trap (FT); and (d) loading of analytes into the GC column for GC-MS analysis. The following is a detailed description. Ambient air was sampled at a flow rate of 8.5-9.5 L/min through a cyclone with PM<sub>2.5</sub> cutting size (BGI Inc., Waltham, MA), a Nafion dryer (PERMA PURE, MD-700-24S-3) to remove

moisture, and then through a carbon denuder (model: ADI-DEN2) to remove volatile organics. The sampled particles were collected on the CTD cell at 30°C for 60 min, followed by derivatization and thermal desorption for 8 min as the temperature of the CTD cell increases to 300°C in 2 min and maintains for 6 min, during which a 10 mL/min helium purge flow combined with a 40 mL/min derivatization flow with N-methyl- N-(trimethylsilyl) trifluoroacetamide (MSTFA) flow through for 8 min. Subsequently, the FT was heated to 300°C in 2 min and kept at 300°C for 10 min, transferring the analytes onto the GC column head (DB-5MS, size 30 m × 0.25 μm × 0.25 μm) by carrier gas. After GC separation, the target organics were sent to the MS detector for quantification. The GC-MS analysis duration for each sample was 60 min while collection of the next sample the CTD cell starts. With the current TAG instrumental set-up, samples were collected every even hour. The post-sampling steps, including in-situ derivatization, thermal desorption, GC-MS analysis, and standby step, took 2 h, thus producing 12 samples per day.”

2. The identification of cooking aerosol markers needs improvement. Attributing all Fatty Acids as cooking aerosol markers is misleading because they are also emitted by other sources, i.e., biomass burning and traffic. The study used a similar measurement method (TAG) to Wang et al. (2020) and is referred to it in the Methods section. That means this study measured other organic molecules, such as sugars (levoglucosan) and PAHs, similar to Wang et al. (2020) study. Moreover, the Supplement Section S2 Figure S7a shows source profiles composed of small and long-chain acids, PAHs, and sugars, suggesting that these data are available for discussion. These other organic groups would improve the identification of cooking source contribution to the total fatty acids emissions.

**Response:** We thank the reviewer for the comment. We agree that fatty acids are emitted by various sources including cooking aerosol, biomass burning and traffic, etc. We have inserted related discussions into the manuscript. We agree that other organic molecules including long-chain acids, sugars, PAHs, etc are also obtained during the same field campaign. We have incorporated these data analysis to improve the identification of cooking source contribution.

(a). Lines 71-74: They are not only markers for cooking/culinary emissions. They can also be emitted by biomass burning, vehicles, and plants (Rogge et al., 1991, 1993, 1998; Simoneit, 2002). Since there are a couple of potential emission sources, discuss how previous studies differentiate

them (Ho et al., 2015, Wang et al., 2020). Ref: Simoneit (2002, [https://doi.org/10.1016/S0883-2927\(01\)00061-0](https://doi.org/10.1016/S0883-2927(01)00061-0)), Rogge et al. (1998, <https://doi.org/10.1021/es960930b>), Rogge et al. (1991, <https://doi.org/10.1021/es00018a015>), Rogge et al. (1993, <https://doi.org/10.1021/es00041a007>), Ho et al. (2015, doi:10.5194/acp-15-3111-2015)

**Response:** Thanks for the comment. We have incorporated related discussions about the various potential sources (For example, biomass burning, vehicle exhaust, coal combustion and sea spray aerosol, etc.) of fatty acids in the urban environment to the manuscript, please refer to Lines 218-231:

**Lines 218-231:** “The main sources of fatty acid-like substances in the atmospheric environment of the study area can be discerned on the basis of characteristic ratios between fatty acids emitted from different sources (Fig.4) (He et al., 2004; Pei et al., 2016; Rogge et al., 1993; Zhao et al., 2015; Zhao et al., 2007). The palmitic acid to stearic acid (P/S) ratios observed in this study had a range between 0.49 and 3.08 (average value: 1.49), significantly lower than those associated with residential coal combustion and industrial coal combustion, while partially overlapping those from biomass burning, vehicle exhaust and sea spray aerosol (Bikkin et al., 2019; Cai et al., 2017; Ho et al., 2015; Zhang et al., 2008; Zhang et al., 2007). Ho et al. (2015) studied urban areas in Beijing where fatty acid concentrations were elevated during traffic restrictions compared to non-restricted periods, suggesting that motor vehicle exhaust is not a significant source of fatty acids in urban areas. In the study of Simoneit (2002), no oleic acid was detected in organic molecular substances from biomass burning. The oleic acid/stearic acid (O/S) ratio from sea spray aerosol samples is 0.16 (Bikkin et al., 2019), which is obviously lower than the ambient data in this study (1.4). Thus, it is reasonable to conclude that biomass burning, vehicle exhaust and sea spray were insignificant sources of fatty acids in urban Changzhou during the observation in this study. Especially during the dinner period, when the O/S ratio was significantly higher and close to the ratio in the organics emitted from traditional culinary types in the Yangtze River Delta region.”

(b). What are EP1, EP2, etc., in Figure 2. A summary table of EP1, EP2, etc., parameters can be added to the Supplement. Additionally, plotting fatty acids in log scale make the time trends incomparable to the other parameters plotted in linear scale (Figure 2). What are the reasons behind separating EP2 and EP3 (Figures 2 and 4)? Instead of grouping and averaging the measurement into

day measurement (D1, D2, D3, etc.), time series of TFAs/OC for EP1, EP2, etc. would show the actual trend and give better insight into the transformation of the fatty acids (Lines 265-269).

**Response:** Thanks for the comments. After careful consideration and re-analysis, we agree with the reviewer that limited scientific conclusions can be drawn from the manuscript Figure 7. We have therefore reorganized the manuscript. Specifically, the second half of section 3.3 (original lines 265-288) and Figure 7 of the original manuscript were deleted, and the previous section (original lines 248-263 and Table 2) was retained and moved to **subsection 3.1 (New manuscript, lines 183-201 and table 2)**. In addition, we removed the information of Episode in Figure 2 and changed the logarithmic Y axis to an arithmetic form.

(c). Section 3.1: How TFAs and FAs are differentiated here? TFAs (Line 168) are similar to FAs (Line 176). Be consistent with using fatty acids or FAs, and FAs or TFAs. Additionally, Considering the other sources of fatty acids, the missing of lunchtime raises a question (Lines 180-185). Could the fatty acids come from biomass burning (residential heating) at night and vehicle emissions in the morning? Wang et al. (2020) observed a small increase in the daytime. Additionally, back trajectory analysis suggests CL#2 and CL#4 airmasses came from the sea (Line 223, Figure 5), suggesting a marine aerosol potential contribution to fatty acids.

**Response:** "TFAs" is the sum of the concentrations of five fatty acids (myristic acid, palmitic acid, stearic acid, oleic acid and linoleic acid). We have replaced all of the "FAs" with "TFAs" to make it consistent throughout the manuscript. We reviewed the molecular marker fingerprinting of fatty acids from different sources (palmitic acid to stearic acid ratio, P/S) and the relationship between P/S and the ratio of oleic acid /stearic acid (O/S) in organic molecular markers emitted from different cooking types (Fig.4). Oleic acid at similar concentrations to palmitic and stearic acid was observed in our study. However in the study of Simoneit (2002), no oleic acid was detected in organic molecular substances from biomass burning, and Ho et al. (2015) studied urban areas in Beijing where fatty acid concentrations were elevated during traffic restrictions compared to non-restricted periods, suggesting that motor vehicle exhaust is not a significant source of fatty acids in urban areas. In addition, Fig.3 and Fig.11 also show that peak contributions of fatty acids and cooking sources are also observed at lunchtime. Therefore, we believe that biomass burning and vehicle exhaust were not the main sources of fatty acids in urban areas. We also explored the profiles of P/S

and O/S in fatty acids from sea spray aerosol emissions, and concluded that sea spray aerosol is not a major contributor to fatty acids in urban areas. Please refer to Lines 209-213 and 216-231.

**Lines 209-213:** “Figure 3(b) shows the contribution of various fatty acids to OC. When the influence of the boundary layer height change was eliminated, the proportion of the five fatty acids and TFAs in OC at noon had a weaker peak, which was still smaller than that during the morning and evening mealtimes. In conclusion, the apparent peaks of TFAs at the dinner time provide strong evidence for source contribution to air pollution from local cooking emissions.”

**Lines 216-231:** “Fatty acids in urban atmospheres are influenced by various anthropogenic (e.g., biomass burning, vehicle exhaust) (Hays et al., 2002; Schauer et al., 2001; Simoneit, 2002; Wang et al., 2009) and biogenic sources (Oliveira et al., 2007; Rogge et al., 2006). The main sources of fatty acid-like substances in the atmospheric environment of the study area can be discerned on the basis of characteristic ratios between fatty acids emitted from different sources (Fig.4) (He et al., 2004; Pei et al., 2016; Rogge et al., 1993; Zhao et al., 2015; Zhao et al., 2007). The palmitic acid to stearic acid (P/S) ratios observed in this study had a range between 0.49 and 3.08 (average value: 1.49), significantly lower than those associated with residential coal combustion and industrial coal combustion, while partially overlapping those from biomass burning, vehicle exhaust and sea spray aerosol (Bikkin et al., 2019; Cai et al., 2017; Ho et al., 2015; Zhang et al., 2008; Zhang et al., 2007). Ho et al. (2015) studied urban areas in Beijing where fatty acid concentrations were elevated during traffic restrictions compared to non-restricted periods, suggesting that motor vehicle exhaust is not a significant source of fatty acids in urban areas. In the study of Simoneit (2002), no oleic acid was detected in organic molecular substances from biomass burning. The oleic acid/stearic acid (O/S) ratio from sea spray aerosol samples is 0.16 (Bikkin et al., 2019), which is obviously lower than the ambient data in this study (1.4). Thus, it is reasonable to conclude that biomass burning, vehicle exhaust and sea spray were insignificant sources of fatty acids in urban Changzhou during the observation in this study. Especially during the dinner period, when the O/S ratio was significantly higher and close to the ratio in the organics emitted from traditional culinary types in the Yangtze River Delta region.”

(d). Based on Figures 4 and 3, the cooking source seems to contribute at night only. In the morning, the fatty acids could be contributed from non-cooking or long-range transport sources, of which the

latter can be a combination of sources. Additionally, Oleic/Palmitic in Figure 4 is peaking at noontime, which could be associated with fresh cooking emissions at lunchtime. Instead of individual species analysis, cluster analysis of the ratios of the fatty acids could give further insight into their atmospheric evolution.

**Response:** We have modified the figure to include diurnal trends of FAs/OC (Fig.3). The corresponding descriptions in the manuscript have also been modified. We agree with the reviewer and cited several papers in the manuscript to illustrate the sources of fatty acids in PM<sub>2.5</sub> in urban areas. Ultimately, it was obtained that evening and nighttime fatty acids are mainly from cooking sources. For daytime hours, we were not able to quantify the contribution of various emission sources and long-range transport to fatty acids. The oxidative degradation of oleic acid emitted from fresh cooking sources in the midday hours has also been explained in the manuscript. Please refer to Lines 205-211 and 299-305:

**Lines 205-211:** “Fatty acids showed a clear diurnal variation, with two peaks observed at around 6:00 and 20:00 local time, respectively, and the dinner time peak was especially prominent. In contrast to the previous observations in Shanghai, no peak was observed at lunchtime. The relatively higher boundary layer during the daytime, facilitated the diffusion of pollutants. The weaker oxidation of uFAs emitted at night made the fatty acid concentration peaks more pronounced at dinner time (Wang et al., 2020). Figure 3(b) shows the contribution of various fatty acids to OC. When the influence of the boundary layer height change was eliminated, the proportion of the five fatty acids and TFAs in OC at noon had a weaker peak, which was still smaller than that during the morning and evening mealtimes.”

**Lines 299-305:** “Fig.8(a) shows the diurnal variation of ozone, oleic acid, and ODPs. The ozone concentration started to rise in the morning (06:00) and peaked in the late afternoon (14:00). The diurnal trend of oleic acid was opposite to that of ozone. The diurnal trend of ODPs was also different from oleic acid, the small peak of ODPs was found at around 12:00 in the daytime, which was earlier than that of ozone. At the same time, oxidative decomposition caused significant decrease in the concentration of oleic acid until the dinner time when large amounts of fresh emissions enter the atmosphere again. The decreasing rate of oleic acid concentration slowed down around noon, probably because of fresh cooking emission at lunch time.”

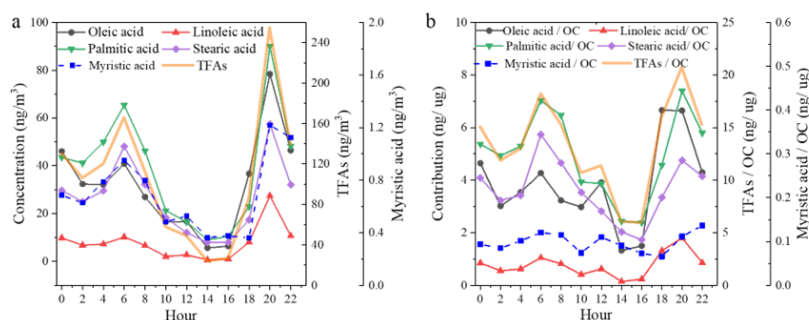

**Fig.3.** Diurnal variation of five FAs and TFAs during the observation period.

3. This study used parameterisation by Wang and Yu (2021) to estimate the fatty acids atmospheric ageing. Wang and Yu (2021) developed the relative rate constant for the ambient fatty acids based on C18:0 stearic acid as the reference molecule for normalisation.

(a). Any reason for choosing Palmitic Acid instead of Stearic Acid (Lines 132-133)? Wang 2020 plotted Oleic/Stearic or Linoleic/Stearic vs Palmitic/Stearic to investigate the ageing of cooking markers. Is there a particular reason for plotting Oleic/Palmitic or Linoleic/Palmitic versus Palmitic/Stearic (Lines 194-202, Figure 4)? Using different denominators would result in different ageing interpretations. However, it could be good to test the effect of Stearic Acid and Palmitic Acid as the ageing reference to the analysis.

**Response:** Thanks for the comments. In order to make the results more scientific and reasonable, modifications were made in the revised manuscript to keep consistent with Wang et al. (2020), and other studies. In the revised manuscript, palmitic acid was replaced with stearic acid as a reference. In brief, the denominator in the calculation of unsaturated fatty acids/saturated fatty acids (uFAs/sFAs) as well as oxidative decomposition products /saturated fatty acids (ODPs/sFAs) is stearic acid.

(b). Lines 292-293, Figure 8: The plot does not show negative linear correlation as inferred in the text and figure. The curves could be potentially negative exponential for Azelaic or Oxononanoic/Palmitic vs Oleic/Palmitic, but not linear. Moreover, there is no R or R<sup>2</sup> value for the regression plots. The R or R<sup>2</sup> value is important to assess the association between the two ratios/parameters. Another method is calculating the p-value to show the statistical significance of the two ratios.

(c). What is the reason for plotting Figure 9 in a 2-power scale instead of a linear scale? If these



axes are correlation values for X9/P vs O/P, Figure 9 should plot R<sup>2</sup> values of each ratio.

**Response to (b) and (c):** We adjusted the section "Atmospheric aging of cooking markers" by merging the original Figure 8 and Figure 9. In Fig.8 (the revised manuscript), the logarithmic form has been used for the y-axis to better distinguish the differences in ODPs/Stearic acid under different gas clusters. No correlation analysis was done in Fig.8 (in the revised manuscript) such that a t-test was not performed. However, significance tests and the p-value estimation was performed in other sections (Fig.9 and Fig.10 in the new manuscript) of this manuscript to make the results more convincing. Please refer to Lines 316-322:

**Lines 316-322:** “Fig.8(b) to (d) show the relationship between ODPs / stearic acid ratio and oleic acid/stearic acid. In CL#2 and CL#4, 9-oxononanoic acid / stearic acid ratio is larger than that in CL#1 and CL#3, and azelaic acid /stearic acid ratio have the same characteristic. The nonanoic acid / stearic acid ratio is not well characterized, probably because most of the nonanoic acid is present in the gas phase. Bikkina et al. (2019) found that the O/S ratio exhibited a nonlinear (power) inverse relationship with azelaic acid in remote marine aerosols. This feature was not found in this study, which is possibly due to the single source class of fatty acids and ODPs in remote marine areas, the diversity of emission sources in urban areas, and their vulnerability to transport.”

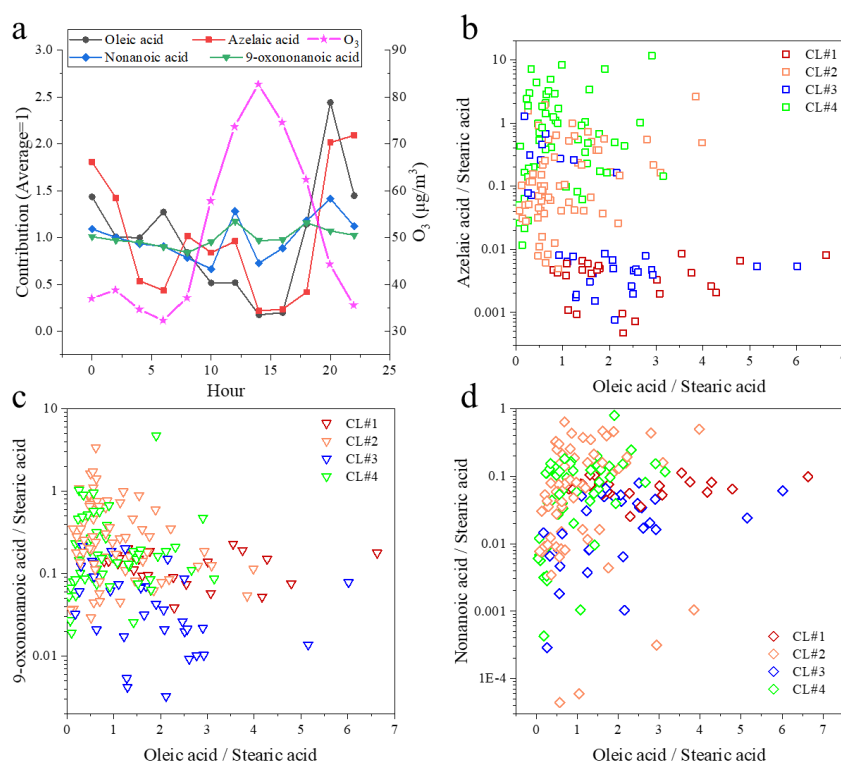

**Fig.8.** Diurnal variation of C9 products and oleic acid in environmental samples compared to O<sub>3</sub> (a);

Correlation of C9 products azelaic acid (b), 9-oxononanoic acid (c), and nonanoic acid (d) with oleic acid.

4. This study used PMF analysis to estimate cooking source contribution to PM<sub>2.5</sub>. However, this study has not adequately discussed the PMF analysis leading to the conclusion of cooking source contribution. It is mentioned that this study would only briefly identify each source factor. However, a discussion of the PMF analysis is still needed to support the conclusion on cooking aerosol contribution to PM<sub>2.5</sub>. The PMF analysis can go to the Supplement as done in this manuscript, but it needs more information. The authors should provide, at a minimum, the correlation coefficient of factor solution profiles and time series and the observed and predicted cooking aerosol markers. Further information, such as the Base Model Displacement Error Method and Bootstrapping analysis, is also important to explore the rotational ambiguity and assess the uncertainty that arises from random errors in the dataset, respectively (e.g., Almeida et al. (2020, <https://doi.org/10.1016/j.envpol.2020.115199>). Lastly, considering the cooking contribution is smaller than biomass burning, and vehicle exhaust (Figure 12), fatty acids discussed here might not be mainly emitted by cooking activities.

**Response:** Thanks for the constructive comments. Detailed analysis of PMF results have been added to the manuscript and supporting information, including the identification of each source factor, the contribution of the source to PM<sub>2.5</sub>, and the analysis and description of the time variation (including diurnal variation) of each source factor. In addition, table S3 shows the summary of error estimation diagnostics from bootstrap (BS), displacement (DISP), and bootstrap combined with displacement (BS-DISP) for the PMF. And, in the “Response No.2 (a) and (c)” we concluded that biomass burning was not the main source of fatty acids, and in the PMF source allocation results, biomass burning factor was mainly tracers of Levoglucosan and mannosan, and only trace fatty acids were allocated to the modified source. Cooking descriptions is also included in the main manuscript. Please refer to Lines 372-378, 380-391 and Section S2 (table S2 and Fig. S5):

**Lines 372-378:** “Source apportionment of PM<sub>2.5</sub> in this field campaign yielded 10 sources, including three secondary sources (secondary sulfate, secondary nitrate and SOA, respectively) and seven primary emission sources (cooking, biomass burning, coal combustion, vehicle exhaust, industrial emissions, dust and fire working, respectively). A detailed description of the identification of each

PMF-resolved source factor is shown in section S2. Briefly, secondary source factors account for the largest share of PM<sub>2.5</sub> (the total was 56.9%, of which secondary nitrate contributes up to 34.4%), and primary emissions contributed to 43.1% of total PM<sub>2.5</sub> (Fig.11). Among the primary source factors, industry makes the largest contribution to PM<sub>2.5</sub> mass concentration (9.9%).”

**Lines 380-391:** “.....the cooking factor was dominated by sFAs and uFAs during the monitoring period, accounting for 4.6% of the total PM<sub>2.5</sub>. The concentration of cooking source and its contribution to total PM<sub>2.5</sub> also showed a clear diurnal variation, with two peaks at around 6:00 and 20:00, respectively, especially at the dinner time. The contribution of cooking to PM<sub>2.5</sub> concentration during mealtime increased significantly compared with other periods, reaching 7.8% at dinner time. The mean concentration of cooking aerosol in the polluted period was estimated to be 4.0 µg/m<sup>3</sup>, which was 5.3 times higher than that in the clean period (0.75 µg/m<sup>3</sup>). The variation was similar to that of fatty acids. The factor profiles of the 10-factor constrained run of PMF are shown in section S2 and Figure S5, together with the time series of contributions from individual source factors. Overall, we estimated that cooking accounted for 5.8% of the total PM<sub>2.5</sub> during the pollution period, which was 1.9 times greater than that of 3.0% during the clean period. During the whole observation period, the cooking factor contributes only a small part of PM<sub>2.5</sub>, but it accounts for 8.1% of the total OC, indicating the importance of cooking emissions to organic matter, which is a significant source of organic pollution in urban areas.”

**Lines 60-84 in the Supporting Information:** “Table S2 lists the input (PM<sub>2.5</sub> and its components) in the PMF modeling. The preferential input species for PMF are those with high abundance and source specific (Norris et al., 2014). Generally, organic markers with lower volatility and lower reactivity were selected. Figure S5 shows the individual source profiles of the 10 factors resolved in the PMF (a) and time series of individual factor contributions (b). Figure 6 shows the diurnal variation in individual source factors resolved by MM-PMF. Table S3 shows the summary of error estimation diagnostics from bootstrap (BS), displacement (DISP), and bootstrap combined with displacement (BS-DISP) for the PMF base run. Generally, BS and DISP results indicated robust PMF solutions. However, BS-DISP results showed higher uncertainties which may be due to the limited sample size in the study. It should be noted that secondary nitrate and secondary sulfate showed the lowest BS mappings and a high chance of mixing with the vehicle exhaust, industry emission and coal combustion factors. Here, we only briefly present the identification of each source

factor.

A total of 10 factors are identified. Among them, seven are primary sources, they are industrial emission, biomass burning, vehicle exhaust, coal combustion, dust, cooking and fireworking. Three secondary sources, namely, secondary nitrate, secondary sulfate and SOA factor (Li et al., 2020; Wang et al., 2017).

Secondary nitrate factor is identified by high contributions of nitrate and ammonium. The secondary sulfate factor is characterized by high loadings of sulfate and ammonium. The SOA factor is characterized by high loadings of an anthropogenic SOA tracer (phthalic acid), isoprene SOA tracer (2-methylglyceric acid) and  $\alpha$ -pinene SOA tracers (3-hydroxyglutaric acid, pinic acid and cis-pinonic acid) (Wang et al., 2017). The profile of industrial emission contains high loadings of Cr, Zn, Fe and Mn (Men et al., 2019; Pant and Harrison, 2013). Industry activities related to steel production, plating, and metallurgy often emit a large amount of these metallic elements. Biomass burning is identified by high loadings of levoglucosan and mannosan (Feng et al., 2013; Wang et al., 2019). The seventh factor contains a high abundance of n-alkanes and hopanes, and is identified to be vehicle exhaust (Pant and Harrison, 2013; Wang et al., 2017). Coal combustion is identified by high loadings of Se, As and Pb (Chen et al., 2013; Wang et al., 2017), and the dust factor is distinguished by crustal elements (ions) Ca, Si, and Ti. The cooking factor is distinguished by fatty acids (oleic acid, palmitic acid and stearic acid) (Li et al., 2020). The fireworking factor is identified by high loadings of flammable metals such as Mg, Cu and Ba, etc.”

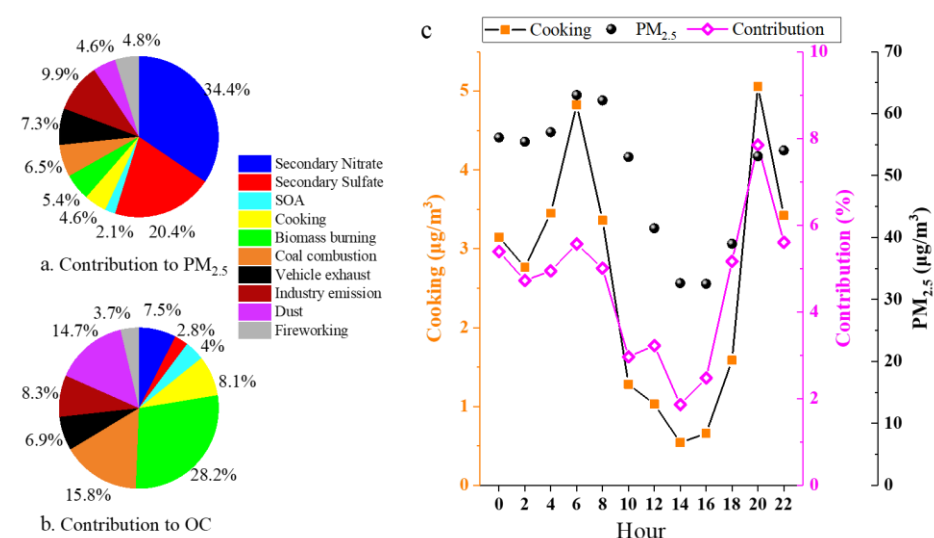

**Fig.11.** Comparison of individual factor contributions to PM<sub>2.5</sub> (a) and OC (b); diurnal variation of

cooking source (c).

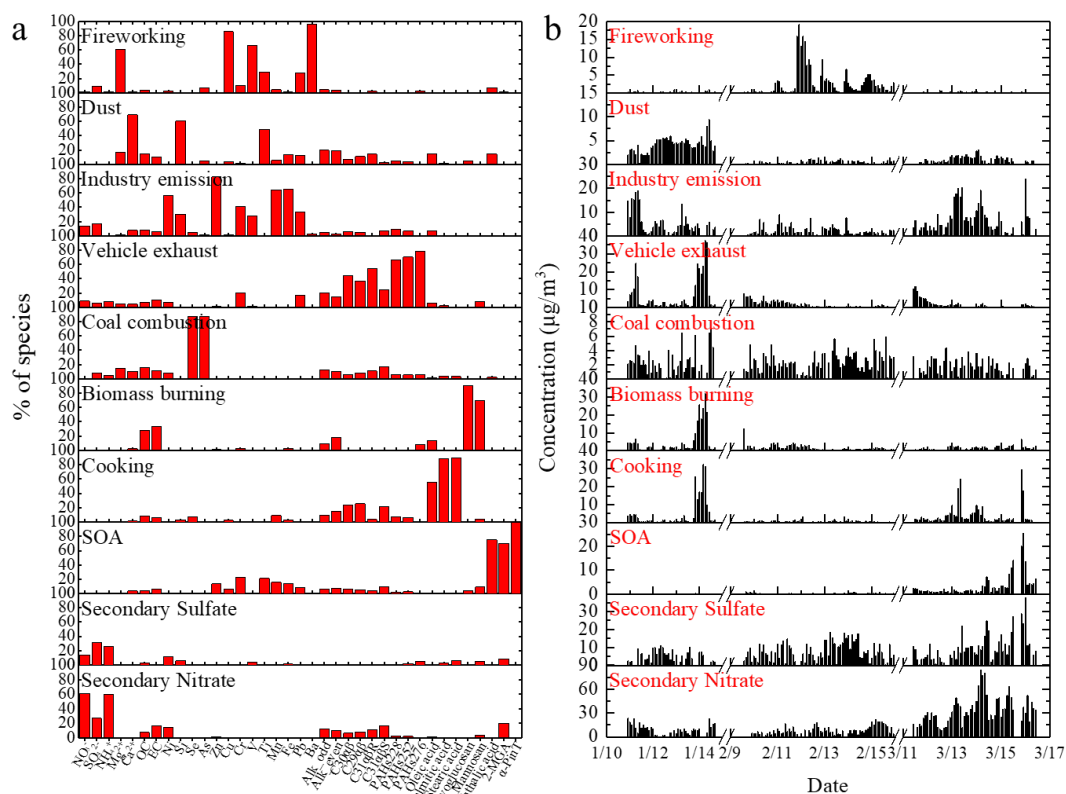

**Fig. S5.** Individual source profiles of the 10 factors resolved in the PMF (a) and time series of individual factor contributions (b).

## Technical comments

a). Lines 227-228: The component of ODPs haven't been explained in the text.

**Response:** Thanks for pointing this out. ODPs has been explained in the revised manuscript.

**Lines 272-274:** “The total concentrations of sFAs, uFAs and uFAs’ oxidative decomposition products (ODPs, in this study, ODPs includes azelaic acid, nonanoic acid and 9-oxononanoic acid)………….”

b). Figure 5: Add a legend to explain the coloured lines for the Cluster.

**Response:** Thanks for the suggestion, we have revised the figure.

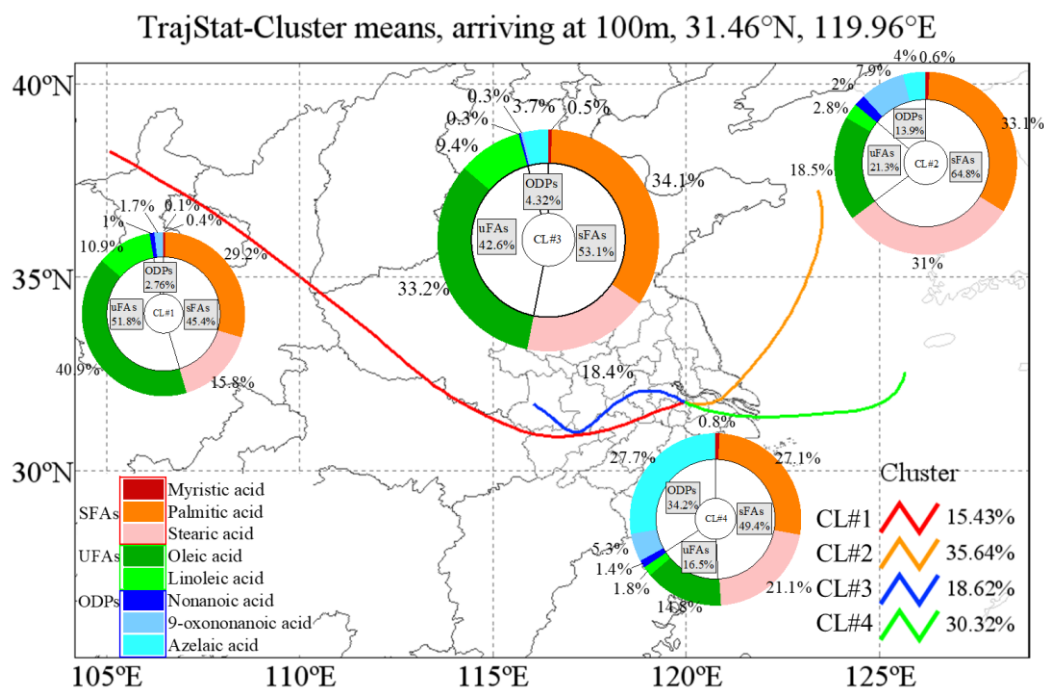

**Fig.8.** Sources for each air mass during the sampling period. The colored lines in the map show the contribution of each directional air mass source to the total trajectory as resolved by the TrajStat model.

c). Lines 260-262: Add reference studies or ratios for TFAs/OC from other sources.

**Response:** Thanks. This section is supplemented in the supporting information as Table S1, which includes the source profiles of organic molecular markers emitted by cooking source, biomass burning, vehicle exhaust and other source factors.

**Table S1** Contribution of TFAs to total OC from different sources (ng/μg).

| Sources         | Min  | Max  | Avg. | Std  | References                                                    |
|-----------------|------|------|------|------|---------------------------------------------------------------|
| Biomass Burning | 6.6  | 25.8 | 14.5 | 5.8  | (Hays et al., 2002; Schauer et al., 2001; Zhang et al., 2007) |
| Coal Combustion | 3.9  | 29.9 | 11.6 | 9.9  | (Zhang et al., 2008)                                          |
| Vehicle Exhaust | 0.32 | 6.2  | 2.6  | 2.1  | (Cai et al., 2017)                                            |
| Cooking         | 27.7 | 82.2 | 55.9 | 21.4 | (Pei et al., 2016; Zhao et al., 2015; Zhao et al., 2007)      |

d). Figure 8a: What does the y-axis Contribution mean?

**Response:** Fig.8(a) y-axis shows the normalized parameters, that is, the concentration of each substance at different times divided by its mean concentration, which is used as the standard to show the diurnal variation rule.

e). Line 311: Correlation as in correlation coefficient values or relationship between Y and X axes?

**Response:** Thanks for the comment. In the original figure, the correlation value and the fitted formula represent the relationship between the parameters represented by the X and Y axes.

f). Lines 391-302, Figure S7: There is no time series or diurnal plot of the PMF factor solution in the Supplement.

**Response:** Thanks for the suggestion. Detailed analysis of PMF results has been inserted to the manuscript and supporting information, including the identification of each source factor, the contribution of the source to  $PM_{2.5}$ , and the analysis and description of the time variation (including diurnal variation) of each source factor. (See “**Response to Comment 4**”.)
